# Supplementary material
Source: PubMed Central journal article supplement (PMC2981217)

## SUPPLEMENTAL INFORMATION

# Biologically Active Isoforms of CobB Sirtuin Deacetylase in *Salmonella enterica* and *Erwinia amylovora*

Alex C. Tucker and Jorge C. Escalante-Semerena\*

Department of Bacteriology, University of Wisconsin-Madison

Running title: bacterial sirtuins isoforms

\*Corresponding author: 1550 Linden Dr, Madison, WI 53706-1521; Tel: 608-262-7379, Fax: 608-265-7909, E-mail: [escalante@bact.wisc.edu](mailto:escalante@bact.wisc.edu)

## SUPPLEMENTAL FIGURES

**Figure S1. *S. enterica* synthesizes two isoforms of CobB.** A. Western blot analysis performed using rabbit  $\alpha$ CobB antiserum on whole-cell lysates of wild type and  $\Delta cobB$  strains grown on NB or minimal medium supplemented with glucose, glycerol, citrate, or acetate (50 mM) to mid-log phase. Purified SeCobB<sub>L</sub> (31.1 kDa) and SeCobB<sub>S</sub> (26.2 kDa) proteins were included as molecular weight standards.

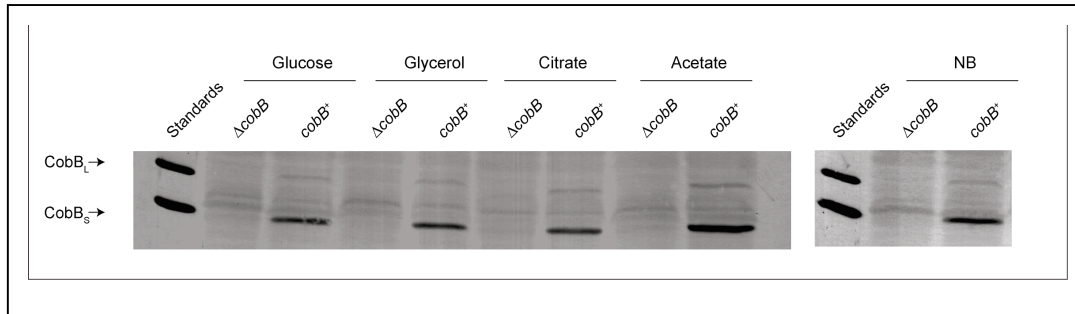

**Figure S2. SeCobB<sub>L</sub> and SeCobB<sub>S</sub> are synthesized from the pCobB<sub>L</sub> and pCobB<sub>S</sub> plasmids when cells are grown on glycerol + dicyanocobinamide + DMB.** Western blot analysis of *S. enterica cobB* strains overproducing CobB<sub>L</sub>, CobB<sub>S</sub>, or CobB<sub>L/S</sub> during growth on glycerol (22 mM), dicyanocobinamide (15 nM), and DMB (125  $\mu$ M). CobB<sub>L</sub> (CobB<sup>M37A,M38A</sup>, encoded by *cobB1372*); CobB<sub>S</sub> (CobB<sup>M1A</sup>, encoded by *cobB1373*).

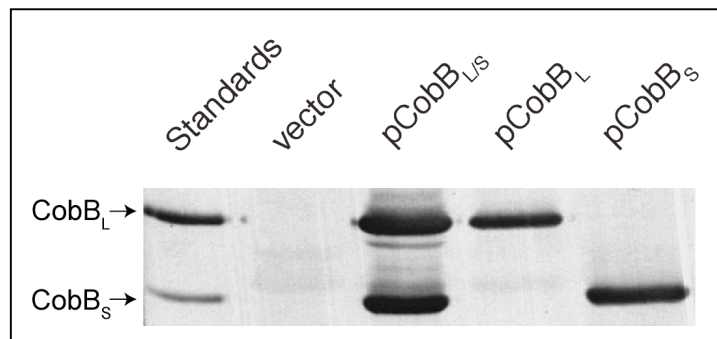

**Figure S3. Gel filtration analysis of SeCobB<sub>L</sub> and SeCobB<sub>S</sub>.** Samples were applied to a HiPrep 26/60 Sephacryl S-100 High Resolution gel filtration column using isocratic elution with sodium phosphate (50 mM, pH 7.4) containing 150 mM NaCl. Calibration was performed with Bio-Rad gel filtration standards supplemented with BSA and DNaseI with linear regression to build the standard curve. Migration of SeCobB<sub>L</sub> and SeCobB<sub>S</sub> through the matrix was analyzed and the retention time was consistent with an apparent mass of monomeric enzyme states.

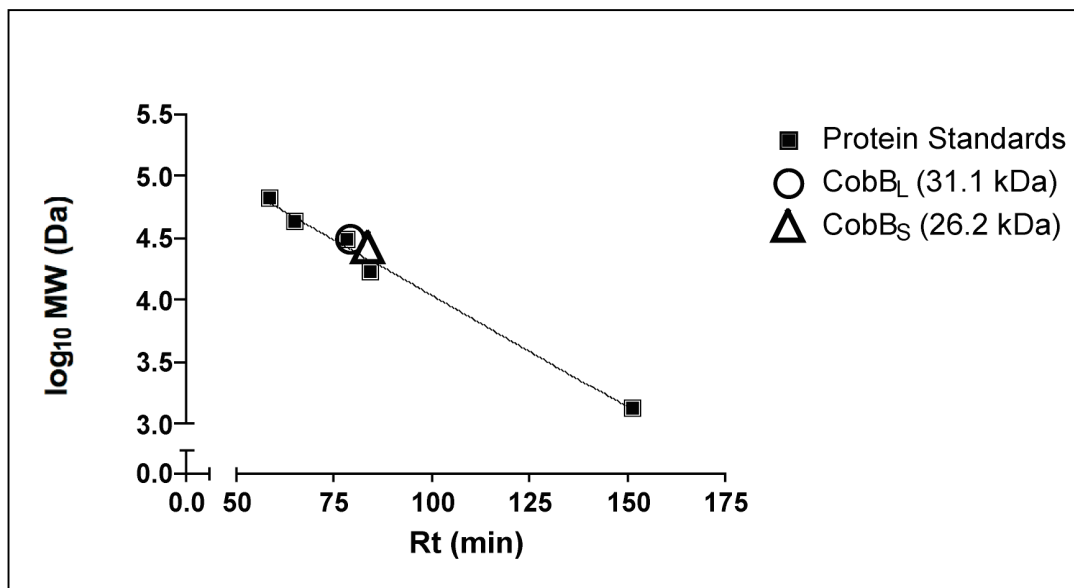

**Figure S4. Helical wheel projection of CobB<sub>L</sub> N-terminal residues.** Residues 6-28 (N-FHRLSRFRKNKRLLRERLRQRIF-C) of the CobB<sub>L</sub> N-terminus were subjected to helical wheel analysis using the DNASTar Protean program (Madison, WI).

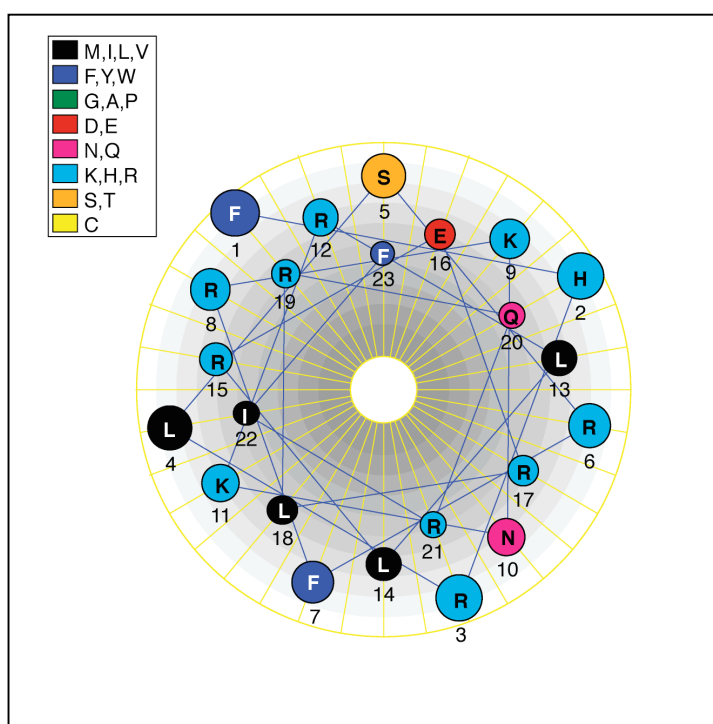

Supplement: supp_192_23_6200__1.pdf [file supp_192_23_6200__1.pdf]
